# Supplementary material for: Microbial legacies alter decomposition in response to simulated global change
Source: PubMed Central journal article supplement — ISME J. 2016 Oct 14;11(2):490–9. doi: 10.1038/ismej.2016.122 (PMC5270563; doi:10.1038/ismej.2016.122), 2016-10-14

**Figure S6:** Average relative abundance (%) in the metagenomic libraries ( $n = 30$ ) of glycoside hydrolase genes targeting various substrates among the bacteria (white bars) and fungi (grey bars). Substrate codes are as follows: CE, cellulose; CH, chitin; D, dextran; F, fructan; LY, lysozyme; M, mixed; O, oligosaccharides; OAP, other animal polysaccharides; OPP, other plant polysaccharides; ST, starch/glycogen; X, xylan.

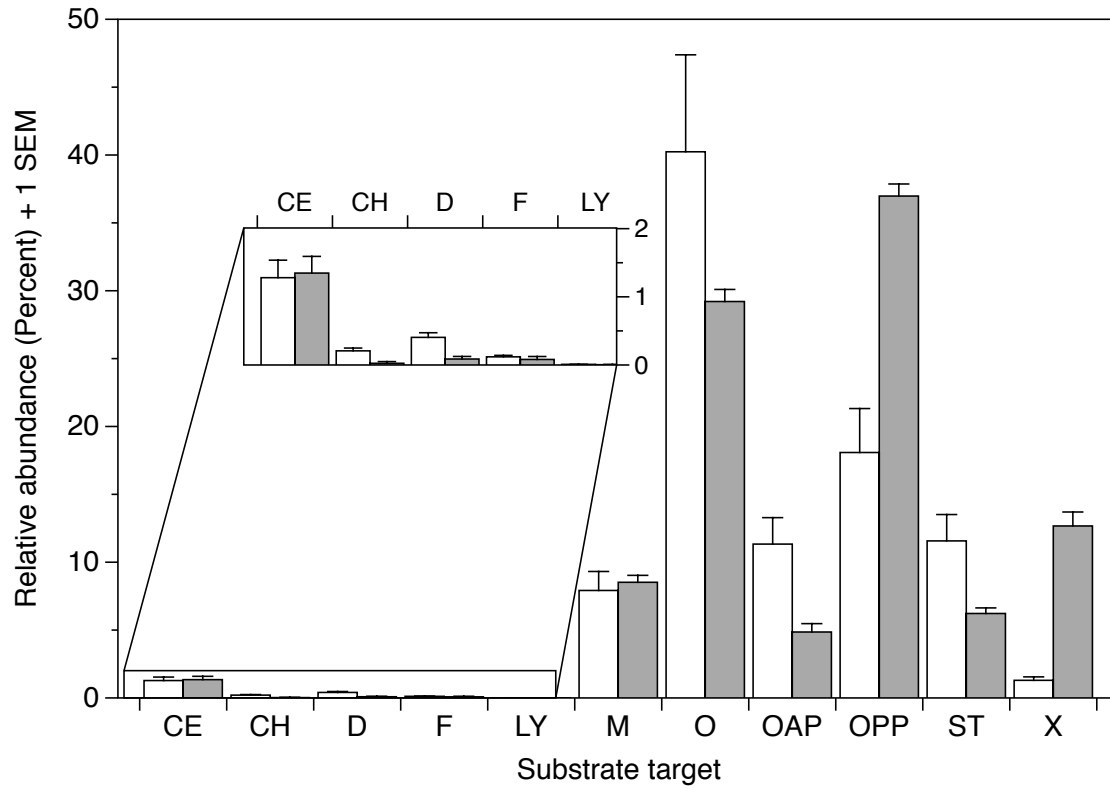

Supplement: ismej2016122x6.pdf [file ismej2016122x6.pdf]
